# Supplementary material for: The Alkaline Stability of Anion Exchange Membrane for Fuel Cell Applications: The Effects of Alkaline Media
Source: PubMed Central journal article supplement (PMC6097010; doi:10.1002/advs.201800065), 2018-06-04
Supplement: ADVS-5-1800065-s001.pdf [file ADVS-5-1800065-s001.pdf]

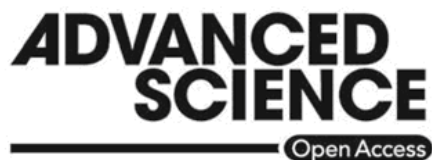

## Supporting Information

for *Adv. Sci.*, DOI: 10.1002/advs.201800065

The Alkaline Stability of Anion Exchange Membrane for Fuel Cell Applications: The Effects of Alkaline Media

*Zhe Sun, Ji Pan, Jiangna Guo, and Feng Yan\**

## Supporting Information

### **The Alkaline Stability of Anion Exchange Membrane for Fuel Cell Applications: the Effects of Alkaline Media**

*Zhe Sun, Ji Pan, Jiangna Guo and Feng Yan\**

State and Local Joint Engineering Laboratory for Novel Functional Polymeric Materials,  
Department of Polymer Science and Engineering, College of Chemistry, Chemical  
Engineering and Materials Science, Soochow University, Suzhou, 215123, China.

E-mail: [fyan@suda.edu.cn](mailto:fyan@suda.edu.cn)

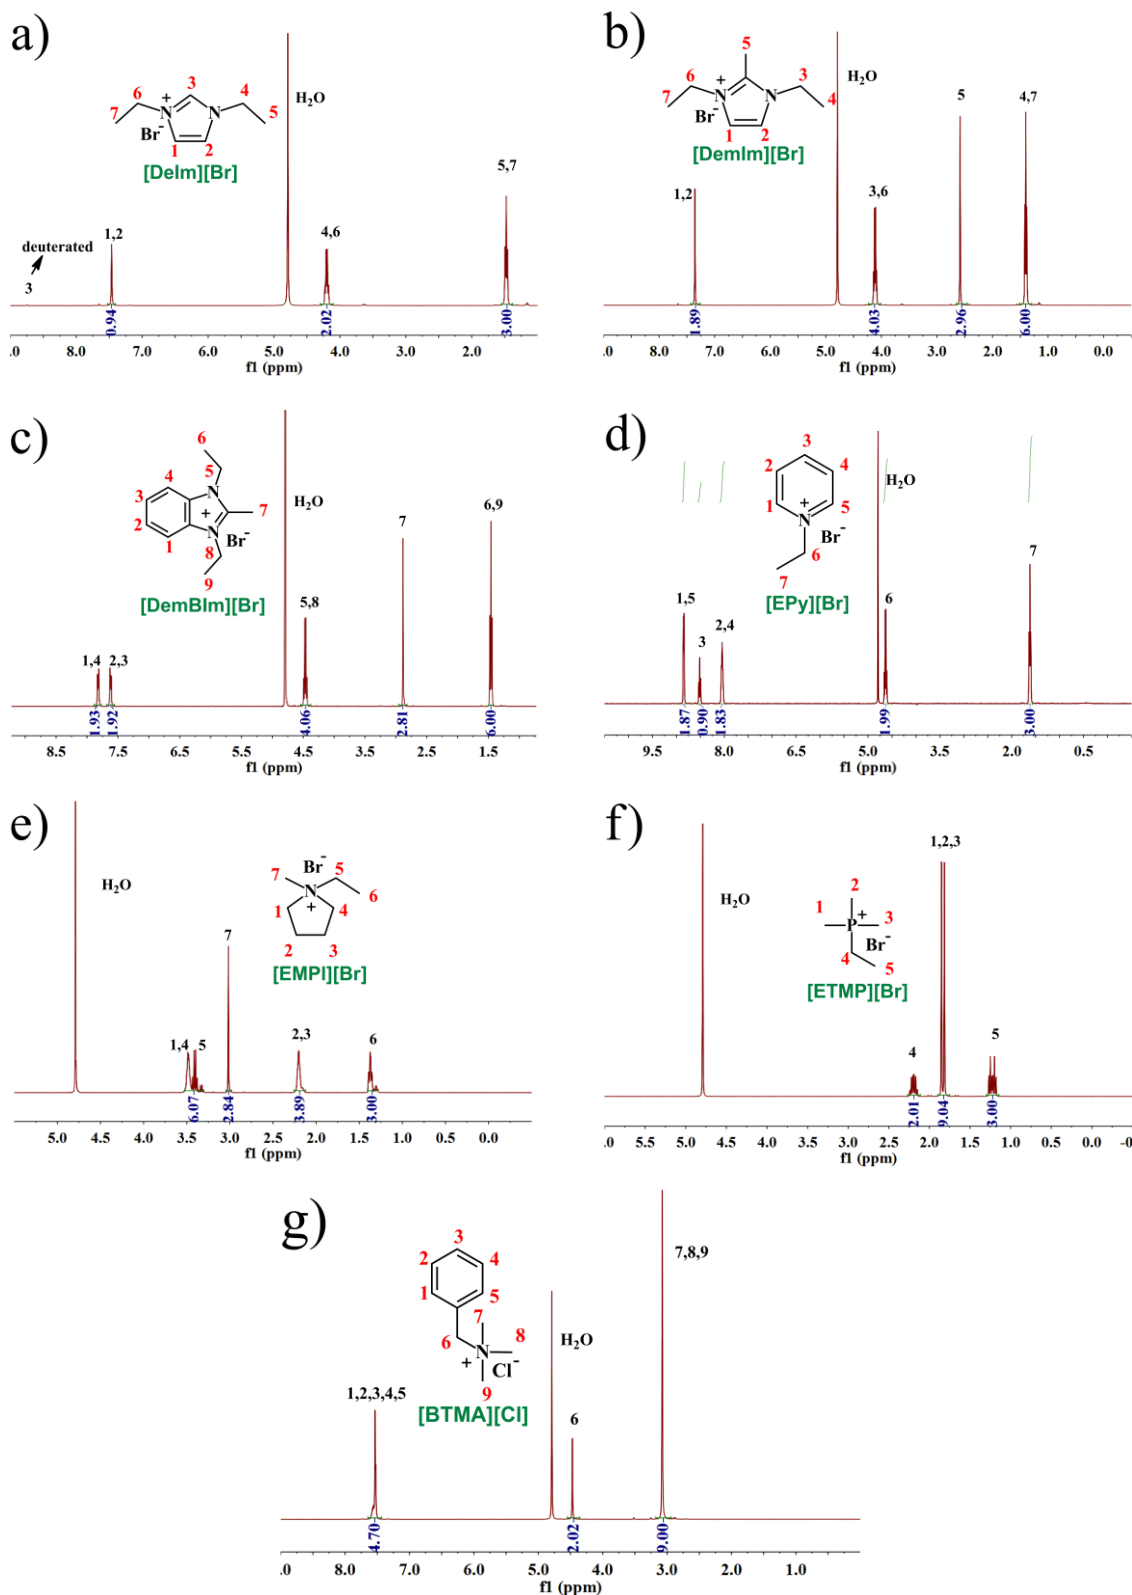

**Figure S1.**  $^1\text{H}$  NMR spectra for various organic cations studied in this work including: (a) [DeIm][Br], (b) [DemIm][Br], (c) [DemBIm][Br], (d) [EPy][Br], (e) [EMPI][Br], (f) [ETMP][Br] and (g) [BTMA][Cl].

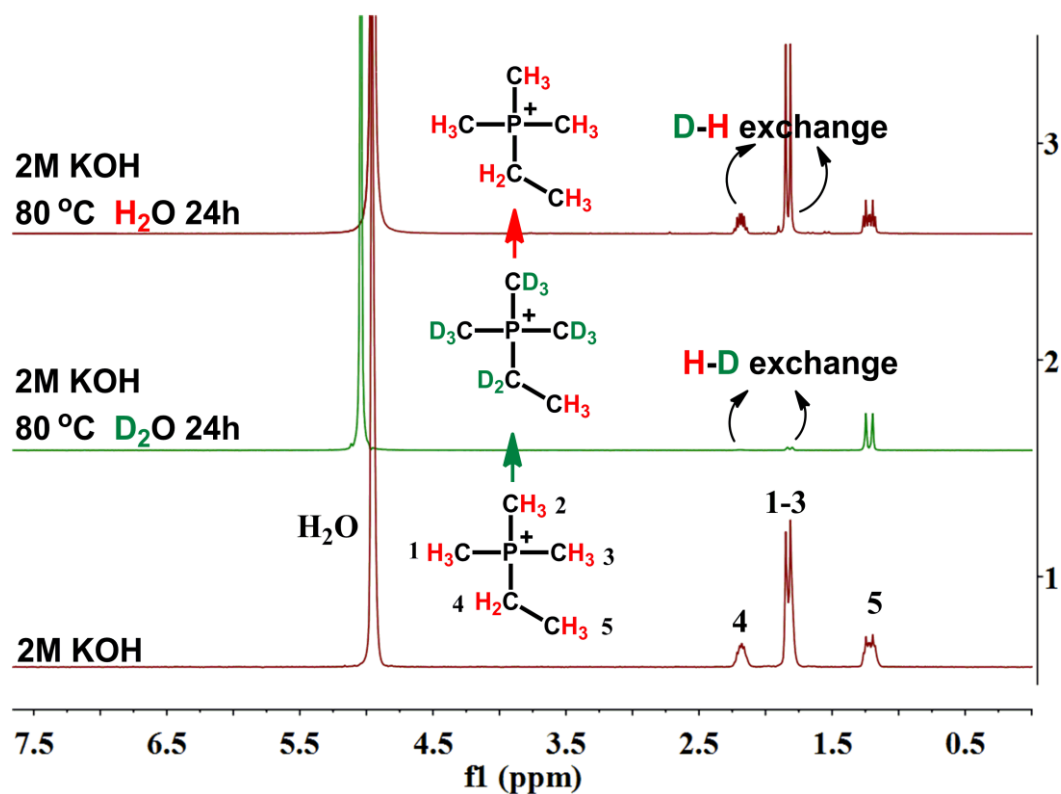

**Figure S2.**  $^1\text{H}$  NMR spectra of  $[\text{ETMP}]^+$  in 2 M KOH/ $\text{D}_2\text{O}$  at  $80\text{ }^\circ\text{C}$  for 24 h, before and after a second storage period in 2 M KOH/ $\text{H}_2\text{O}$  for 24 h at  $80\text{ }^\circ\text{C}$ . The green and red arrows indicate the disappearance and reappearance of  $\alpha\text{-C}$  protons after the interconversion of hydrogen and deuterium, respectively.

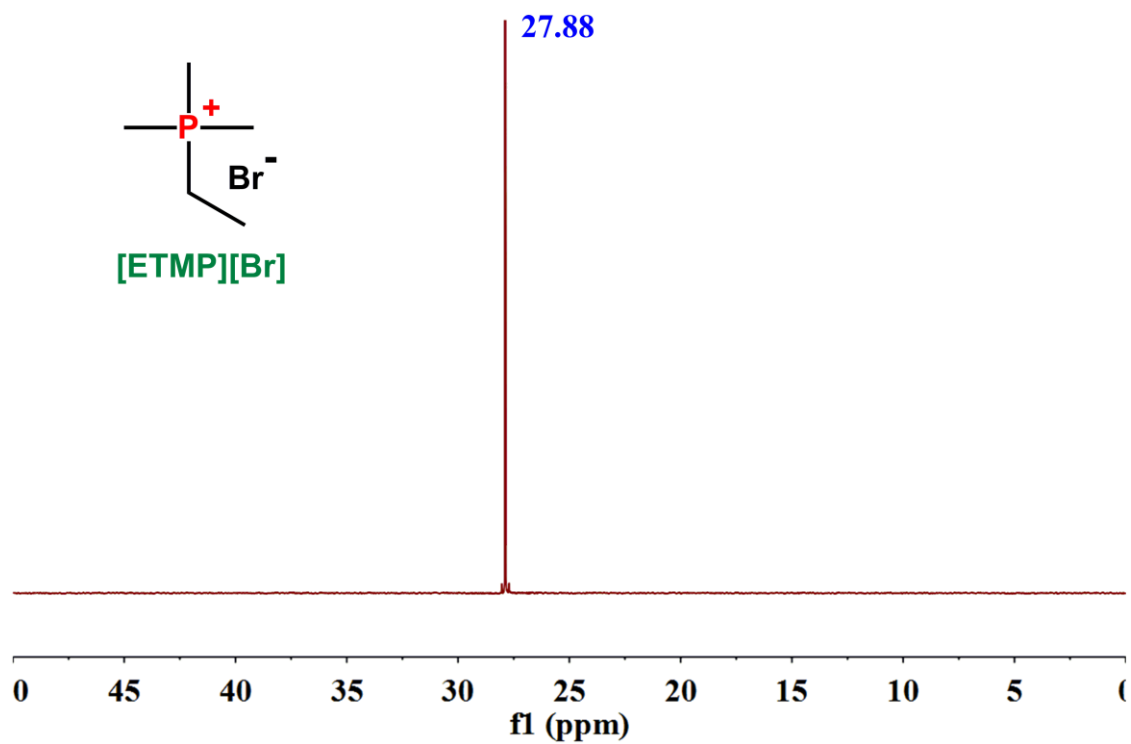

Figure S3.  $^{31}\text{P}$  NMR spectra for [ETMP][Br].

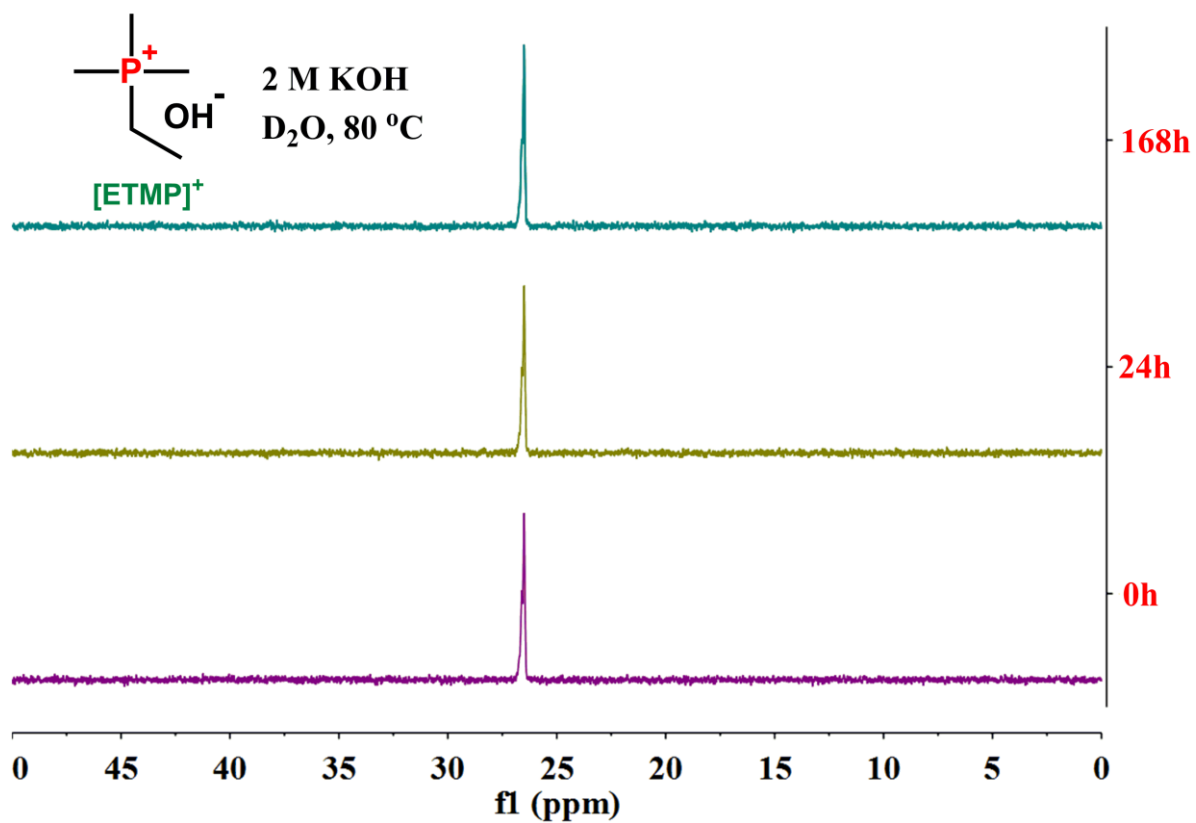

**Figure S4.**  $^{31}\text{P}$  NMR spectra for [ETMP] $^+$  in 2 M KOH ([KOH]/[cation] = 15/1, molar ratio)  $\text{D}_2\text{O}$  solution at 80 °C for 0, 24 and 168h, respectively.

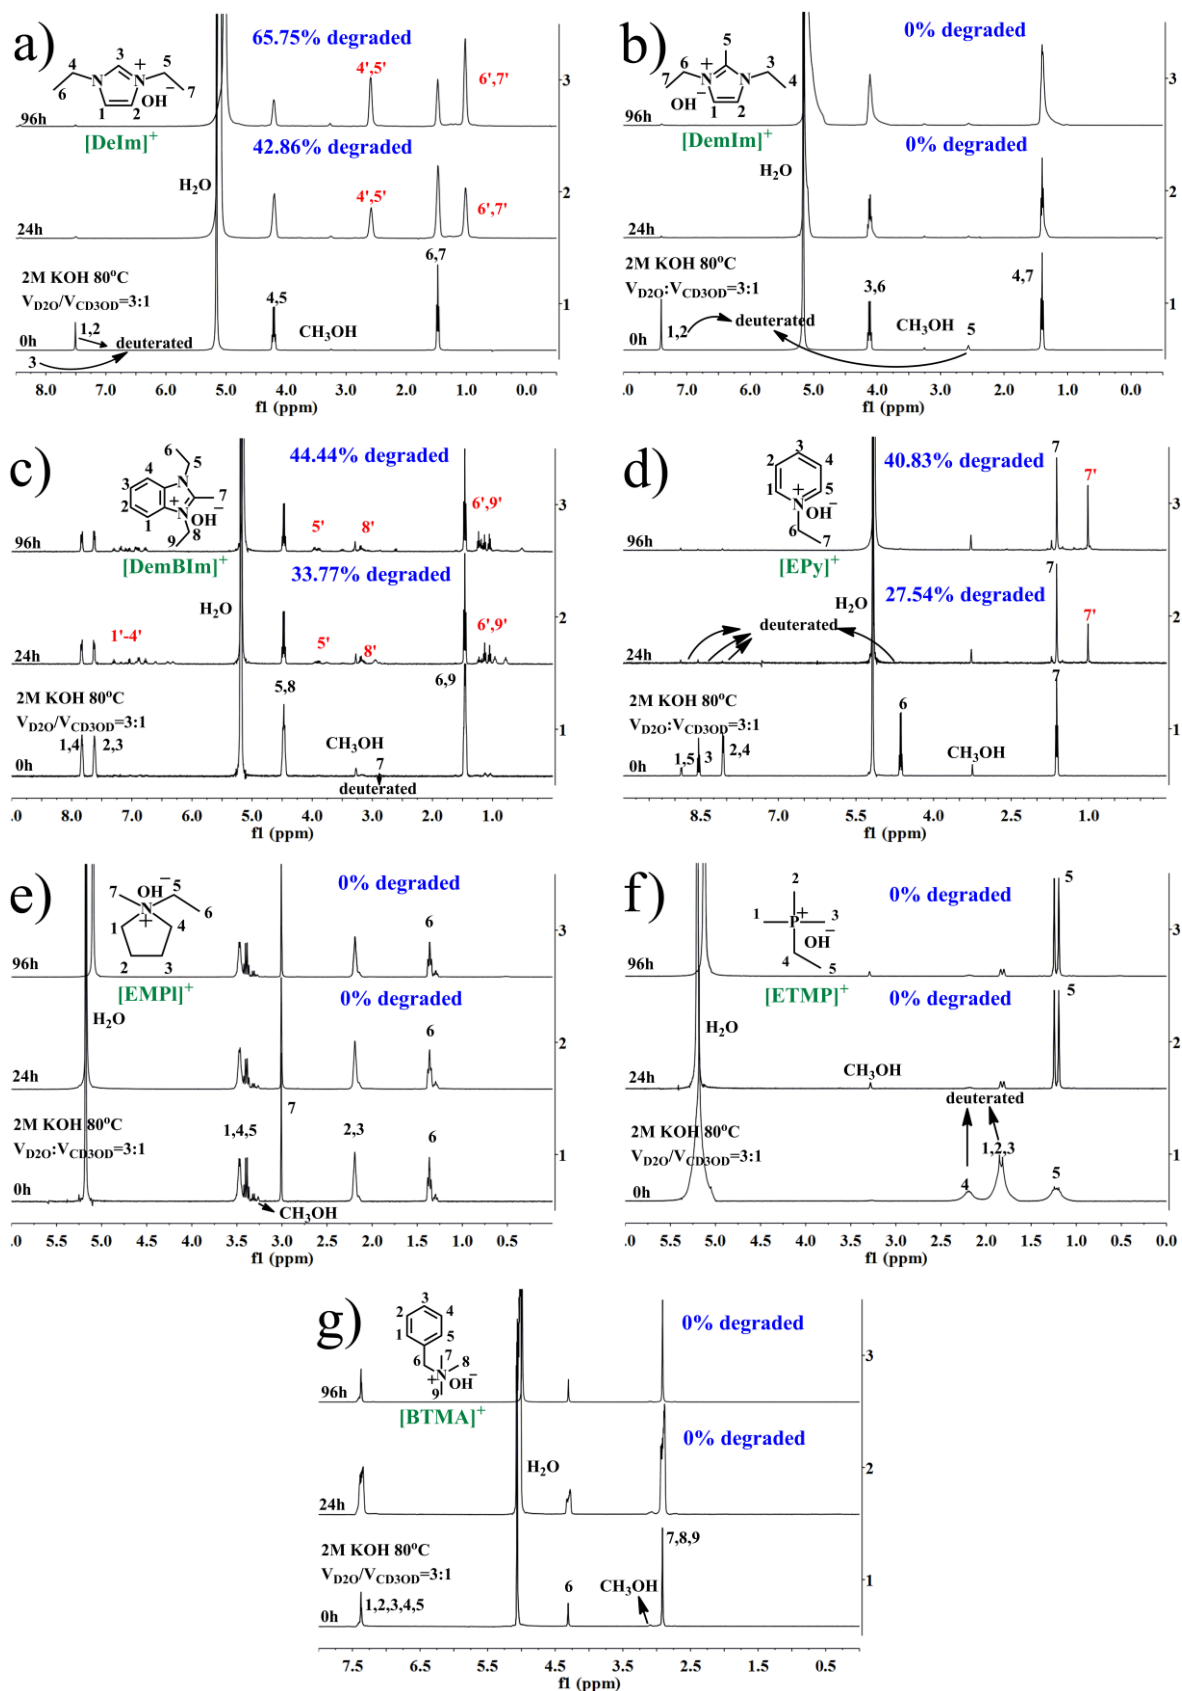

**Figure S5.**  $^1\text{H}$  NMR spectra for (a) [DeIm] $^+$ , (b) [DemIm] $^+$ , (c) [DemBIm] $^+$ , (d) [EPy] $^+$ , (e) [EMPI] $^+$ , (f) [ETMP] $^+$  and (g) [BTMA] $^+$  in 2 M KOH ([KOH]/[cation] = 15/1, molar ratio) mixed solution ( $\text{V}_{\text{D}_2\text{O}}/\text{V}_{\text{CD}_3\text{OD}}=3:1$ ) at 80 °C for 24 and 96h, respectively.

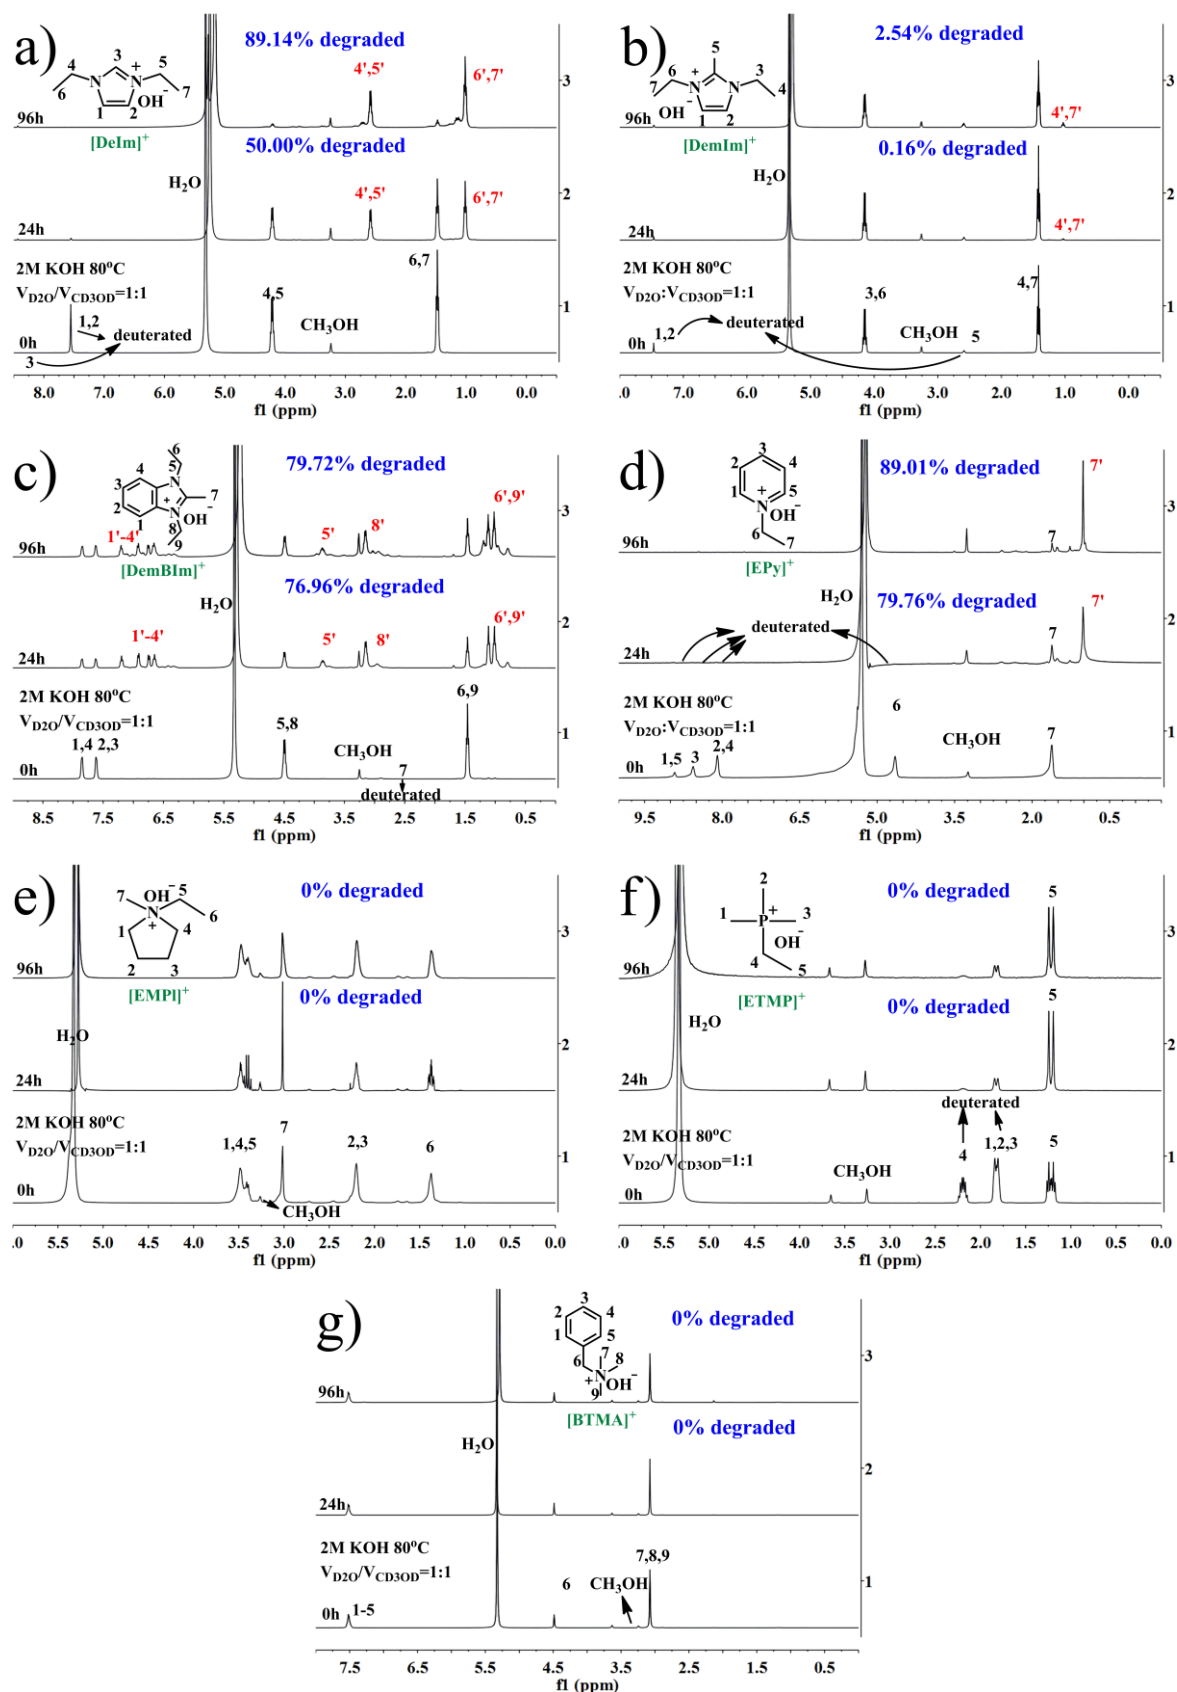

**Figure S6.**  $^1\text{H}$  NMR spectra for (a)  $[\text{DeIm}]^+$ , (b)  $[\text{DemIm}]^+$ , (c)  $[\text{DemBIm}]^+$ , (d)  $[\text{EPy}]^+$ , (e)  $[\text{EMPI}]^+$ , (f)  $[\text{ETMP}]^+$  and (g)  $[\text{BTMA}]^+$  in 2 M KOH ( $[\text{KOH}]/[\text{cation}] = 15/1$ , molar ratio) mixed solution ( $\text{V}_{\text{D}_2\text{O}}/\text{V}_{\text{CD}_3\text{OD}}=1:1$ ) at  $80^\circ\text{C}$  for 24 and 96h, respectively.



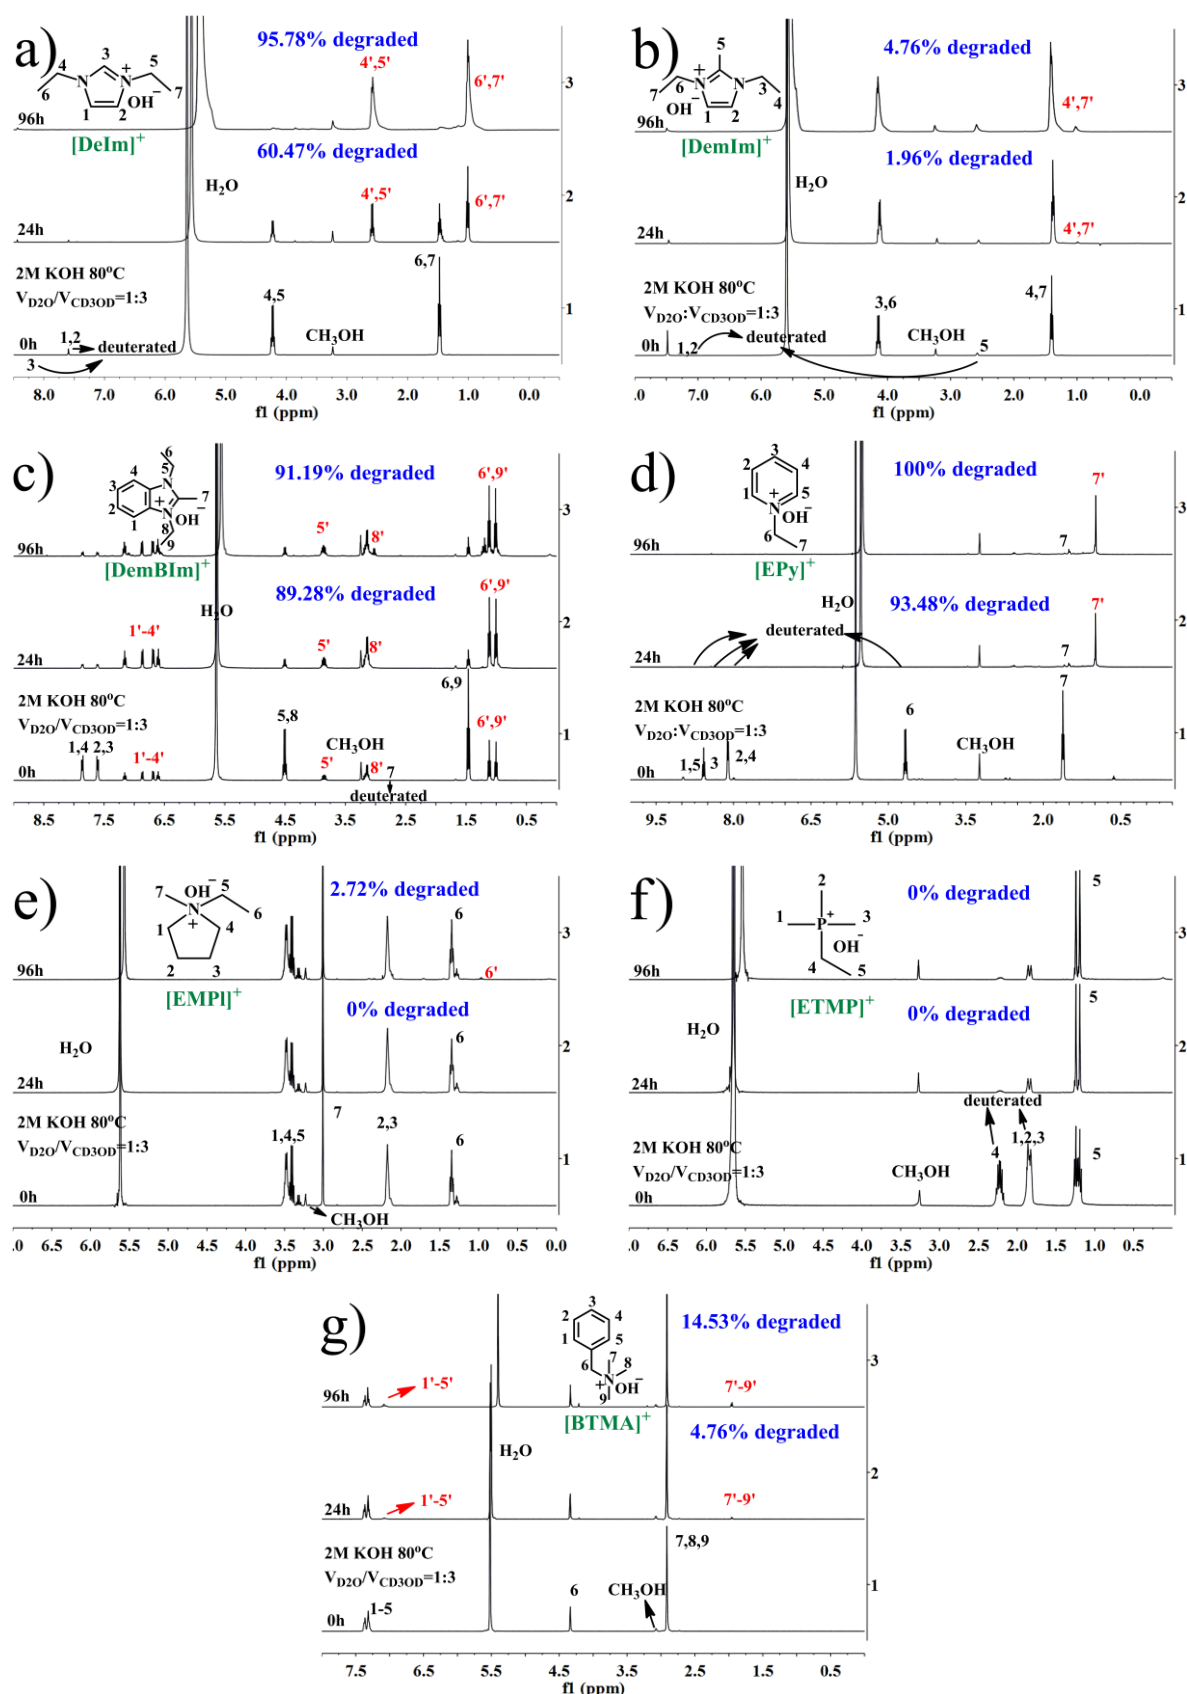

**Figure S7.**  $^1\text{H}$  NMR spectra for (a)  $[\text{DeIm}]^+$ , (b)  $[\text{DemIm}]^+$ , (c)  $[\text{DemBIm}]^+$ , (d)  $[\text{EPy}]^+$ , (e)  $[\text{EMPI}]^+$ , (f)  $[\text{ETMP}]^+$  and (g)  $[\text{BTMA}]^+$  in 2 M KOH ( $[\text{KOH}]/[\text{cation}] = 15/1$ , molar ratio) mixed solution ( $V_{\text{D}_2\text{O}}/V_{\text{CD}_3\text{OD}}=1:3$ ) at 80 °C for 24 and 96h, respectively.

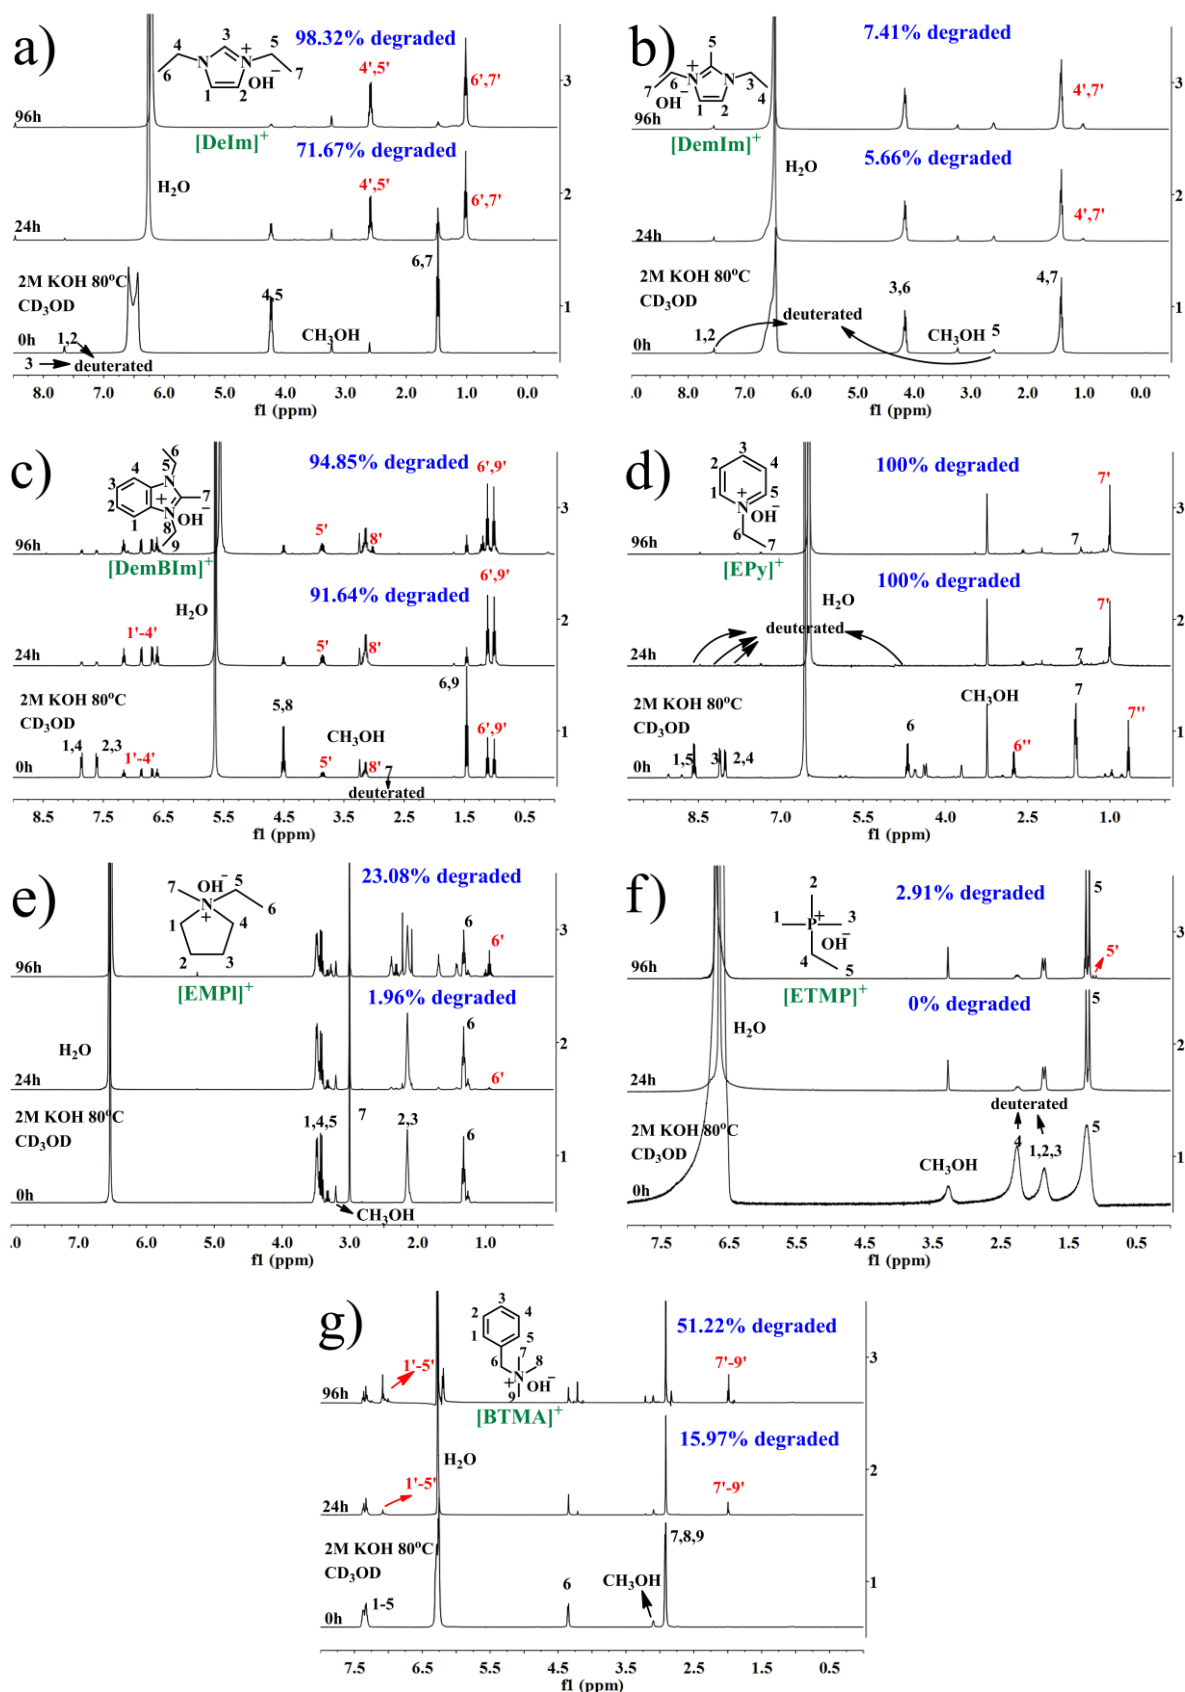

**Figure S8.**  $^1\text{H}$  NMR spectra for (a) [DeIm] $^+$ , (b) [DemIm] $^+$ , (c) [DemBIm] $^+$ , (d) [EPy] $^+$ , (e) [EMPI] $^+$ , (f) [ETMP] $^+$  and (g) [BTMA] $^+$  in 2 M KOH ([KOH]/[cation] = 15/1, molar ratio)  $\text{CD}_3\text{OD}$  solution at 80 °C for 24 and 96h, respectively.

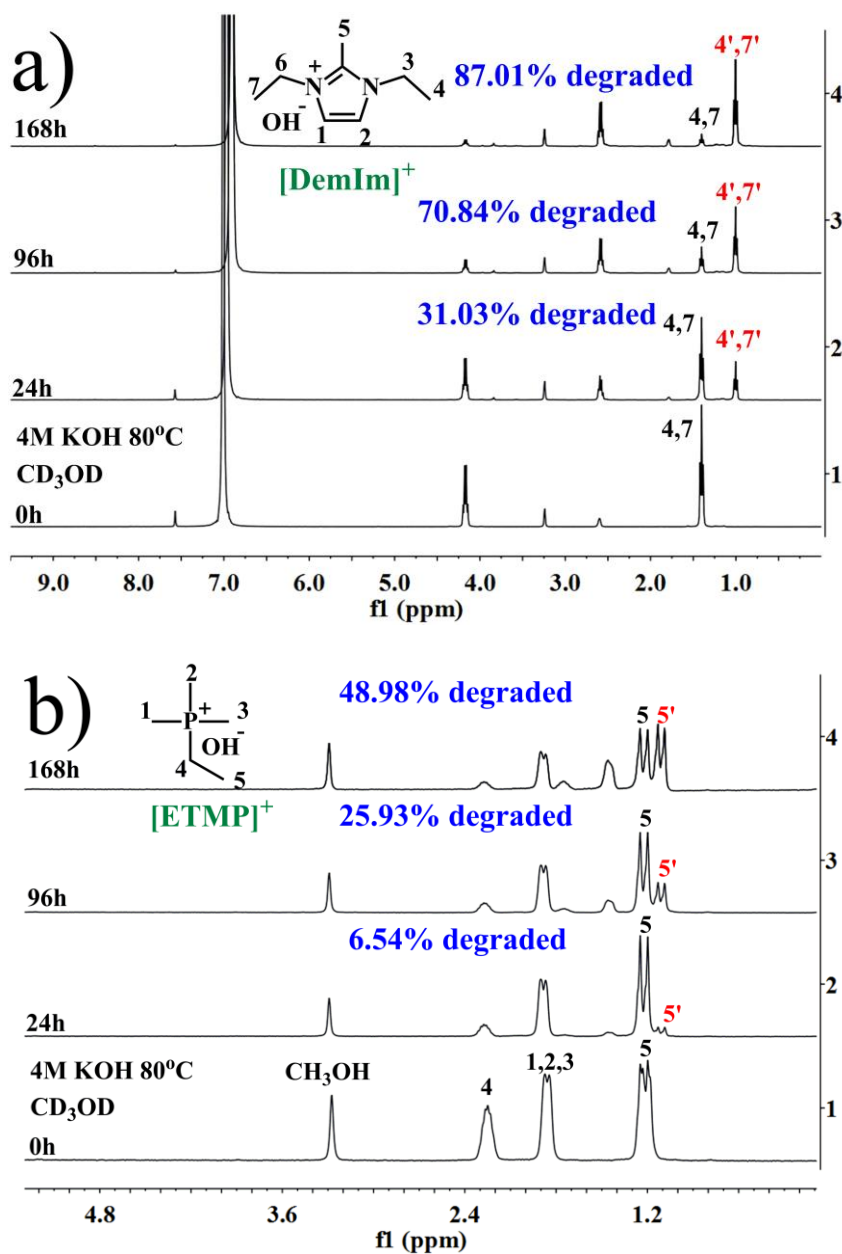

**Figure S9.**  $^1\text{H}$  NMR spectra for (a)  $[\text{DemIm}]^+$ , (b)  $[\text{ETMP}]^+$  in 4 M KOH  $\text{CD}_3\text{OD}$  solutions ( $[\text{KOH}]/[\text{cation}] = 15/1$ , molar ratio) at 80 °C for 24, 96 and 168h, respectively.

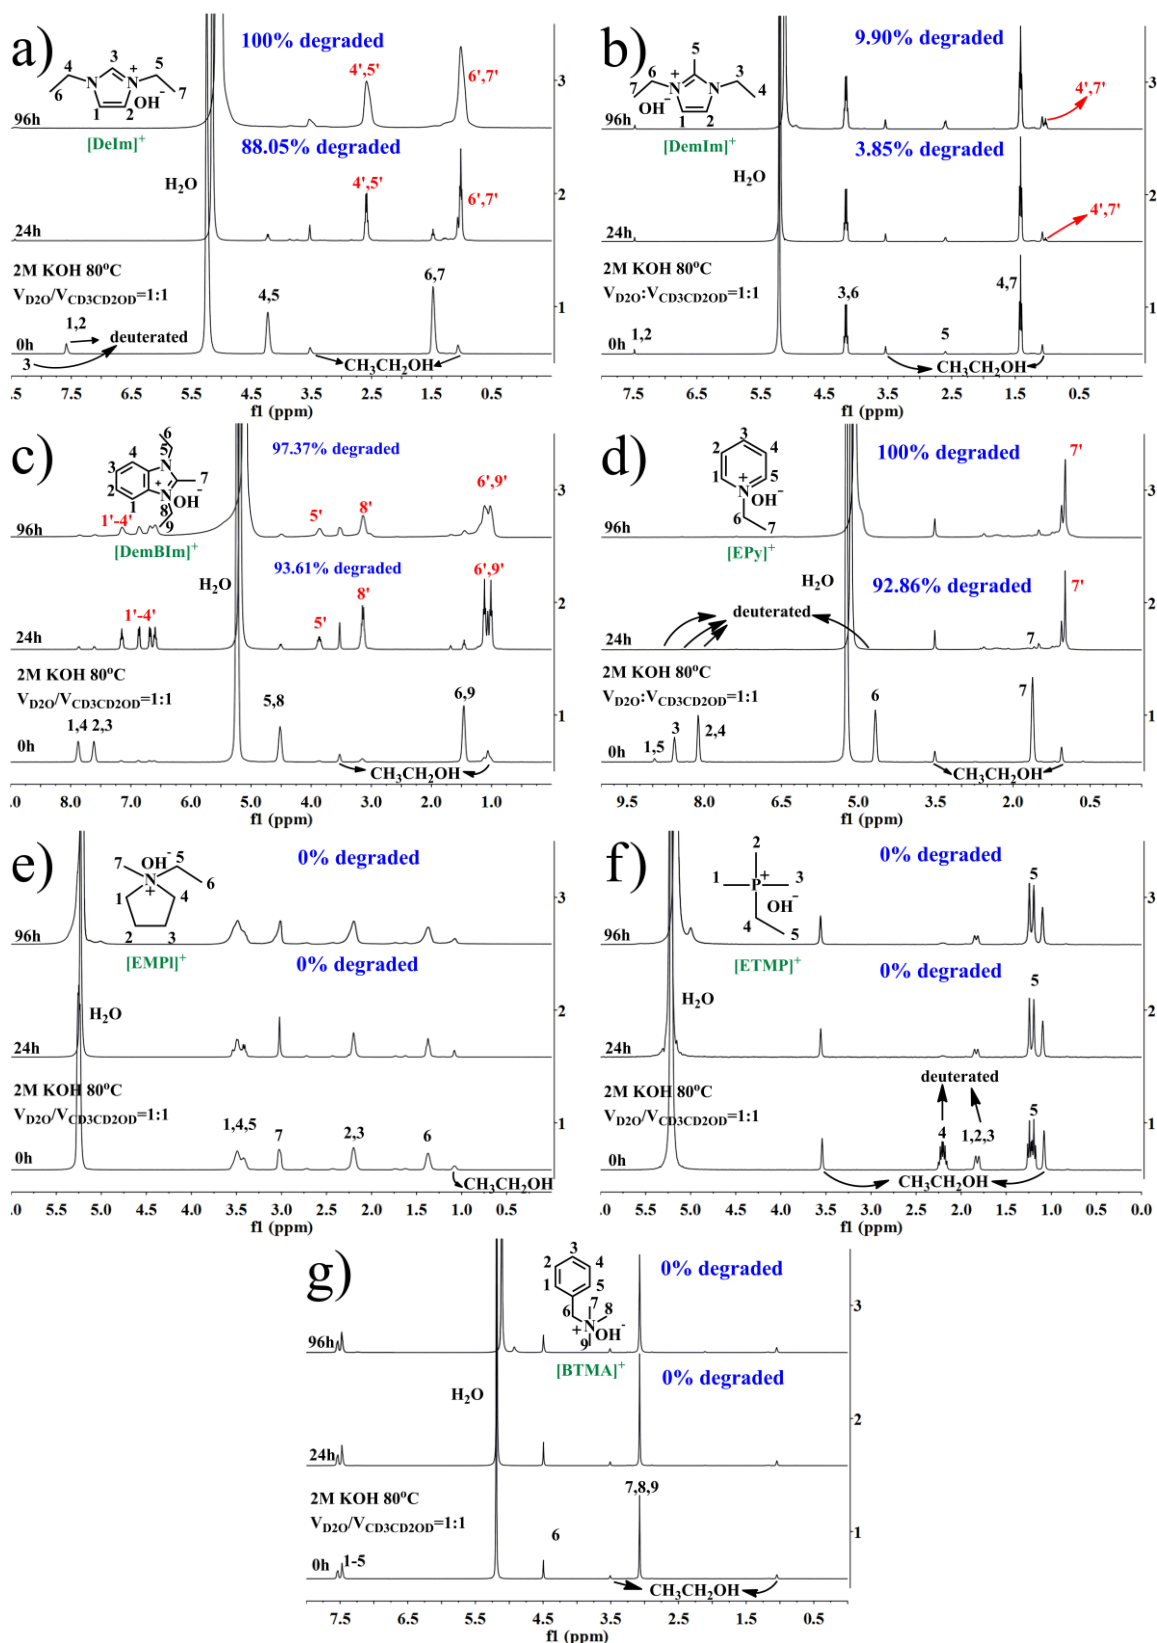

**Figure S10.**  $^1\text{H}$  NMR spectra for (a)  $[\text{DeIm}]^+$ , (b)  $[\text{DemIm}]^+$ , (c)  $[\text{DemBIm}]^+$ , (d)  $[\text{EPy}]^+$ , (e)  $[\text{EMPI}]^+$ , (f)  $[\text{ETMP}]^+$  and (g)  $[\text{BTMA}]^+$  in 2 M KOH ( $[\text{KOH}]/[\text{cation}] = 15/1$ , molar ratio) mixed solution ( $\text{V}_{\text{D}_2\text{O}}/\text{V}_{\text{CD}_3\text{CD}_2\text{OD}} = 1:1$ ) at  $80^\circ\text{C}$  for 24 and 96h, respectively.

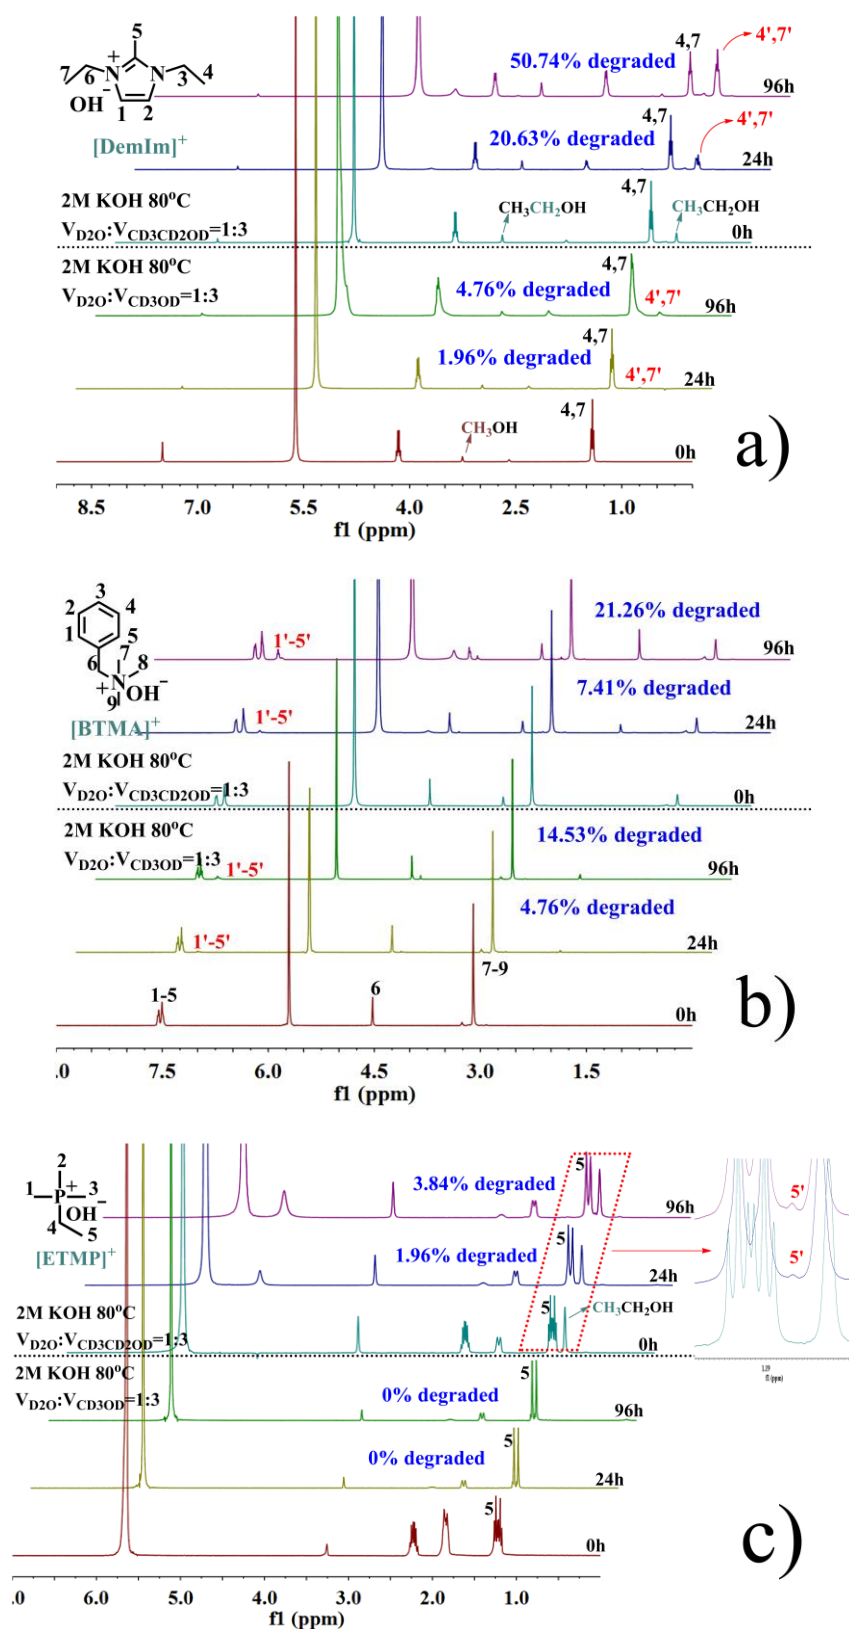

**Figure S11.** <sup>1</sup>H NMR spectra for (a) [DemIm]<sup>+</sup>, (b) [BTMA]<sup>+</sup> and (c) [ETMP]<sup>+</sup> in 2 M KOH ([KOH]/[cation] = 15/1, molar ratio)  $V_{D_2O}/V_{CD_3OD}=1:3$  and  $V_{D_2O}/V_{CD_3CD_2OD}=1:3$  solution at 80 °C for 24 and 96h, respectively.

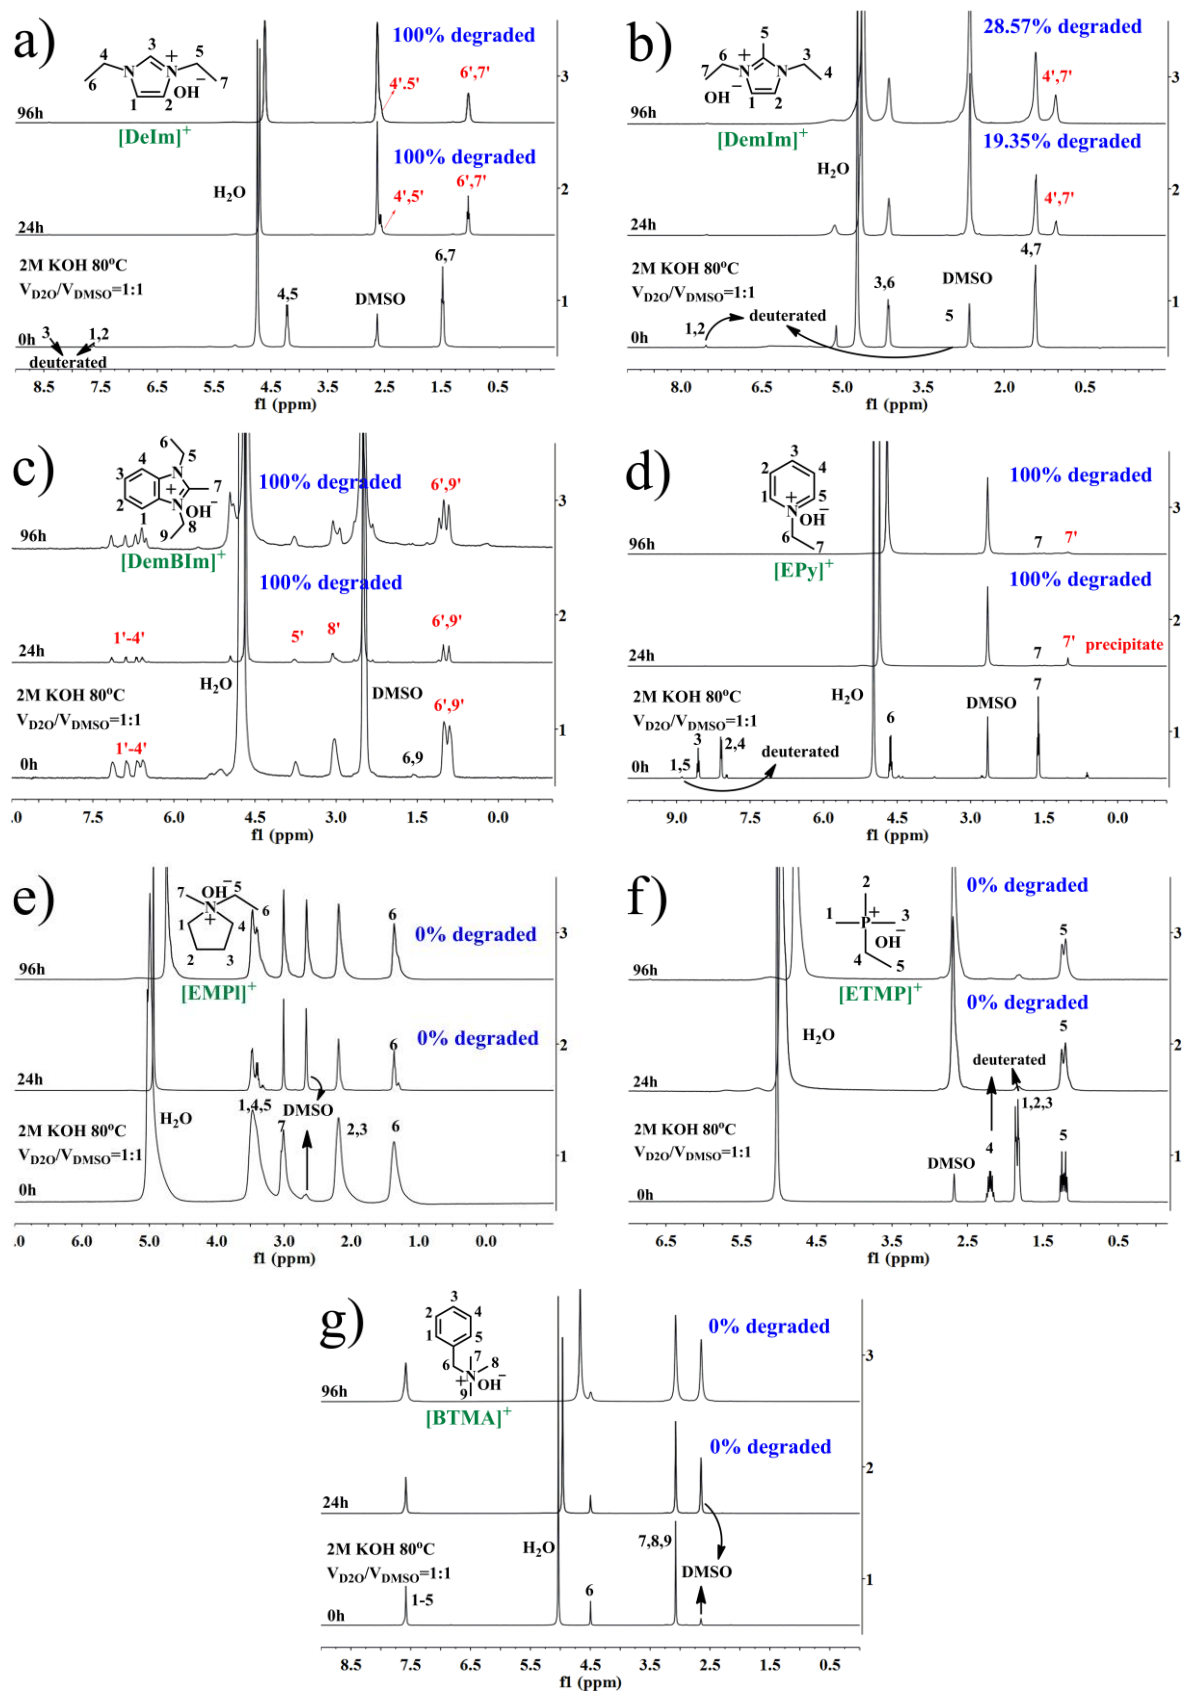

**Figure S12.**  $^1\text{H}$  NMR spectra for (a) [DeIm]<sup>+</sup>, (b) [DemIm]<sup>+</sup>, (c) [DemBIm]<sup>+</sup>, (d) [EPy]<sup>+</sup>, (e) [EMPI]<sup>+</sup>, (f) [ETMP]<sup>+</sup> and (g) [BTMA]<sup>+</sup> in 2 M KOH ([KOH]/[cation] = 15/1, molar ratio) mixed solution ( $V_{\text{D}_2\text{O}}/V_{\text{DMSO}}=1:1$ ) at 80 °C for 24 and 96h, respectively.

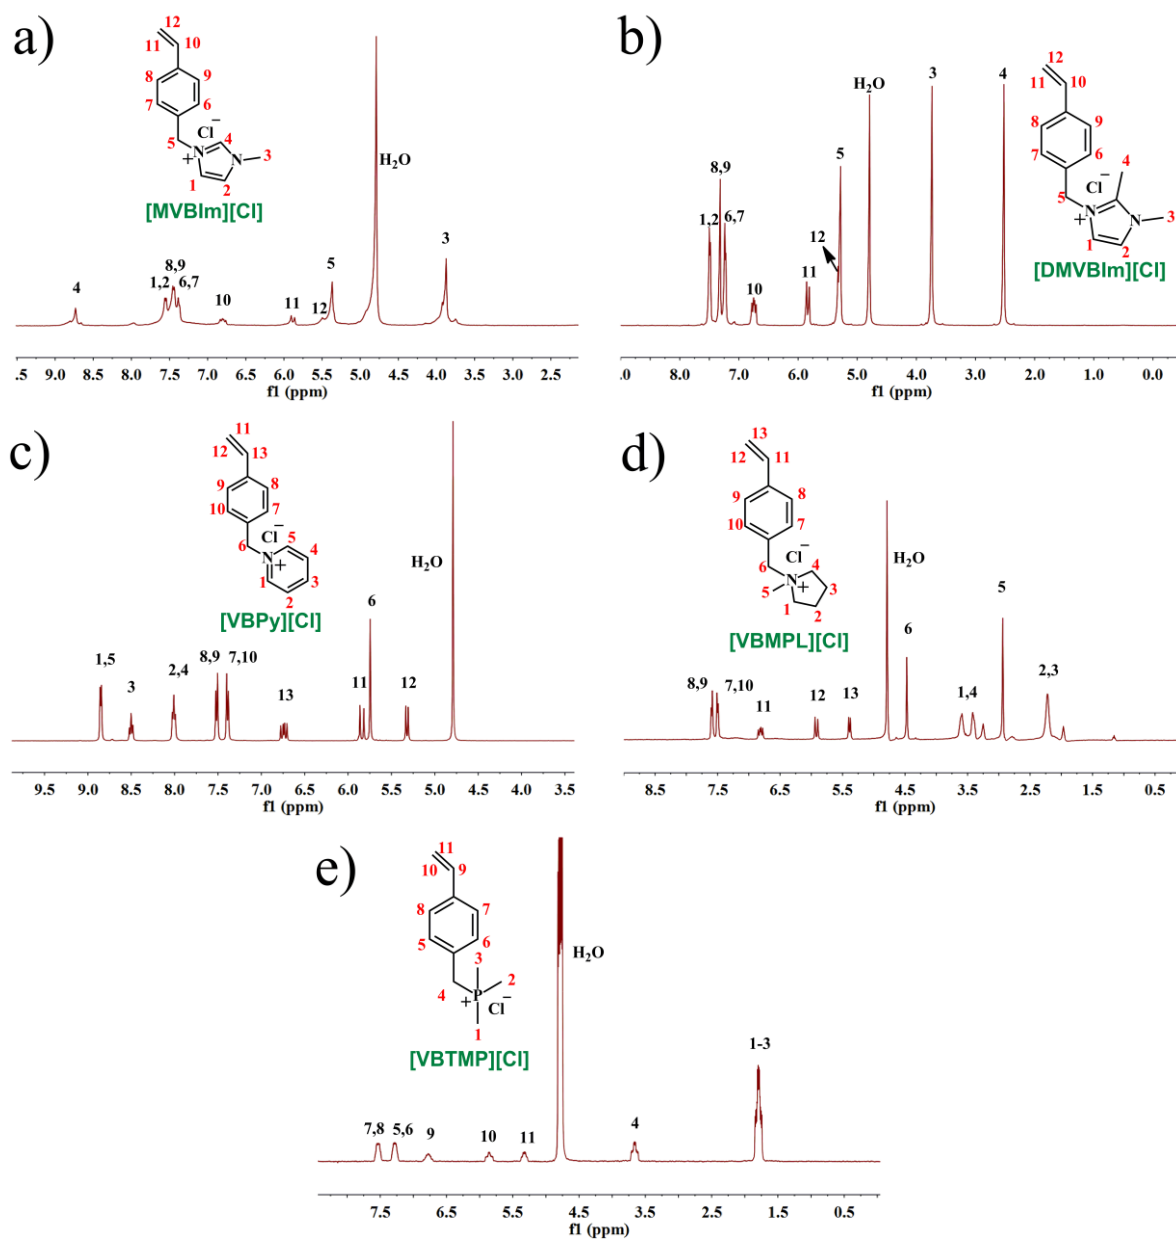

**Figure S13.**  $^1\text{H}$  NMR spectra for the vinyl monomer synthesized in this work including: (a)  $[\text{MVBIm}][\text{Cl}]$ , (b)  $[\text{DMVBIm}][\text{Cl}]$ , (c)  $[\text{VBPy}][\text{Cl}]$ , (d)  $[\text{VBMPL}][\text{Cl}]$  and (e)  $[\text{VBTMP}][\text{Cl}]$ .



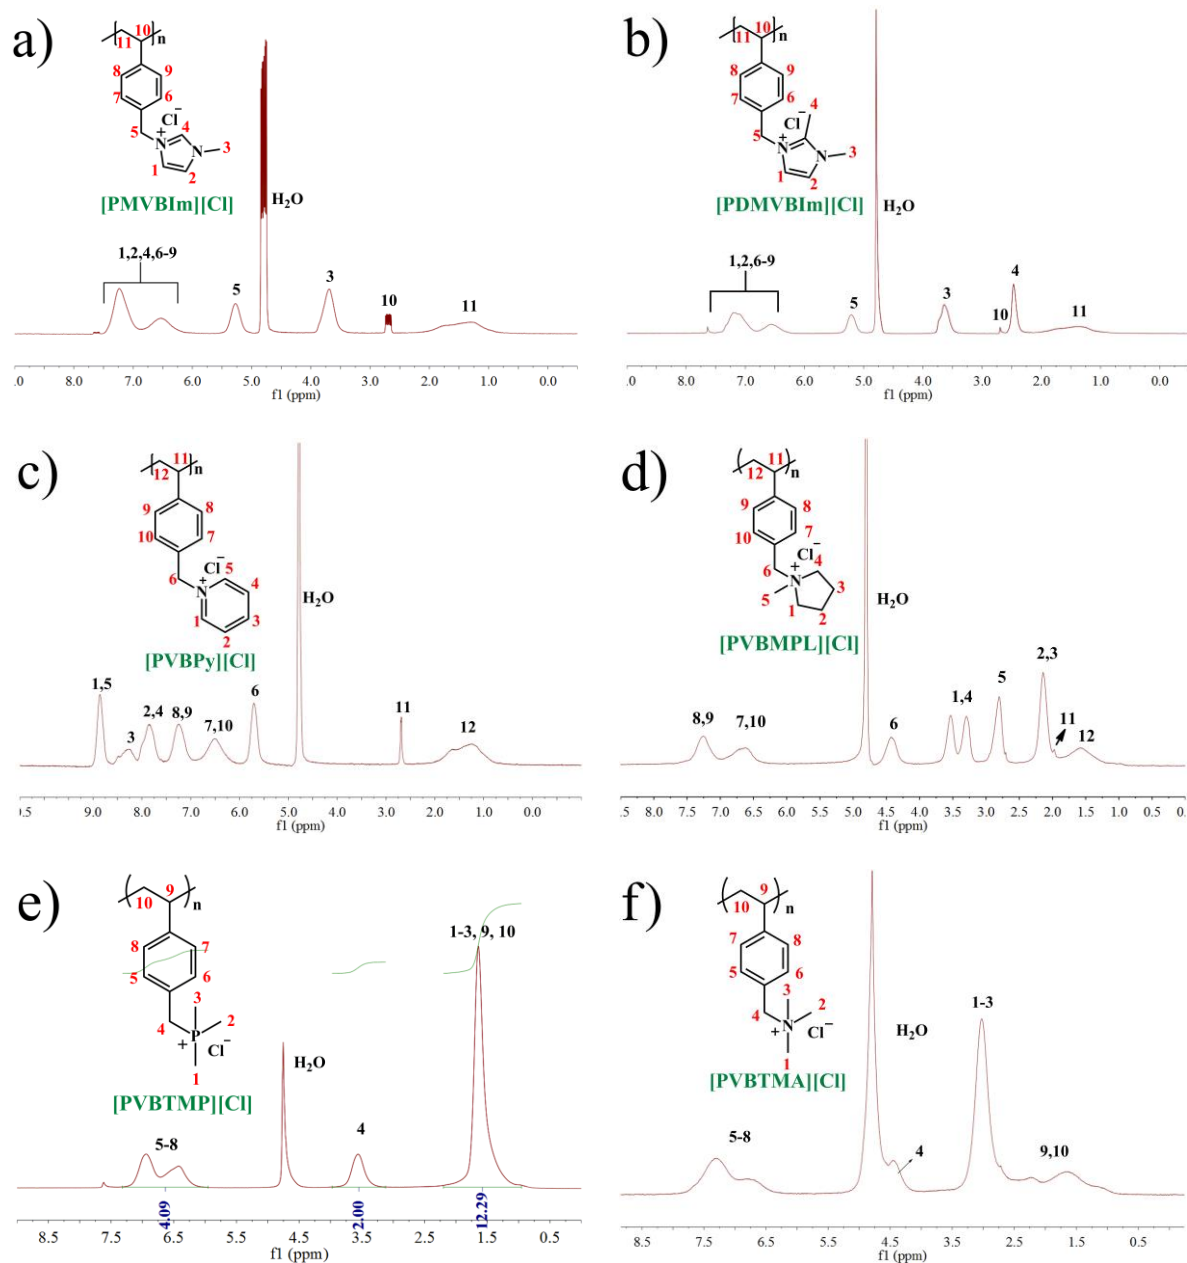

**Figure S14.**  $^1\text{H}$  NMR spectra for various cationic polymers studied in this work including: (a) [PMVBIIm][Cl], (b) [PDMVBIIm][Cl], (c) [PVBPy][Cl], (d) [PVBMPIL][Cl], (e) [PVBTMP][Cl] and (f) [PVBTMA][Cl].



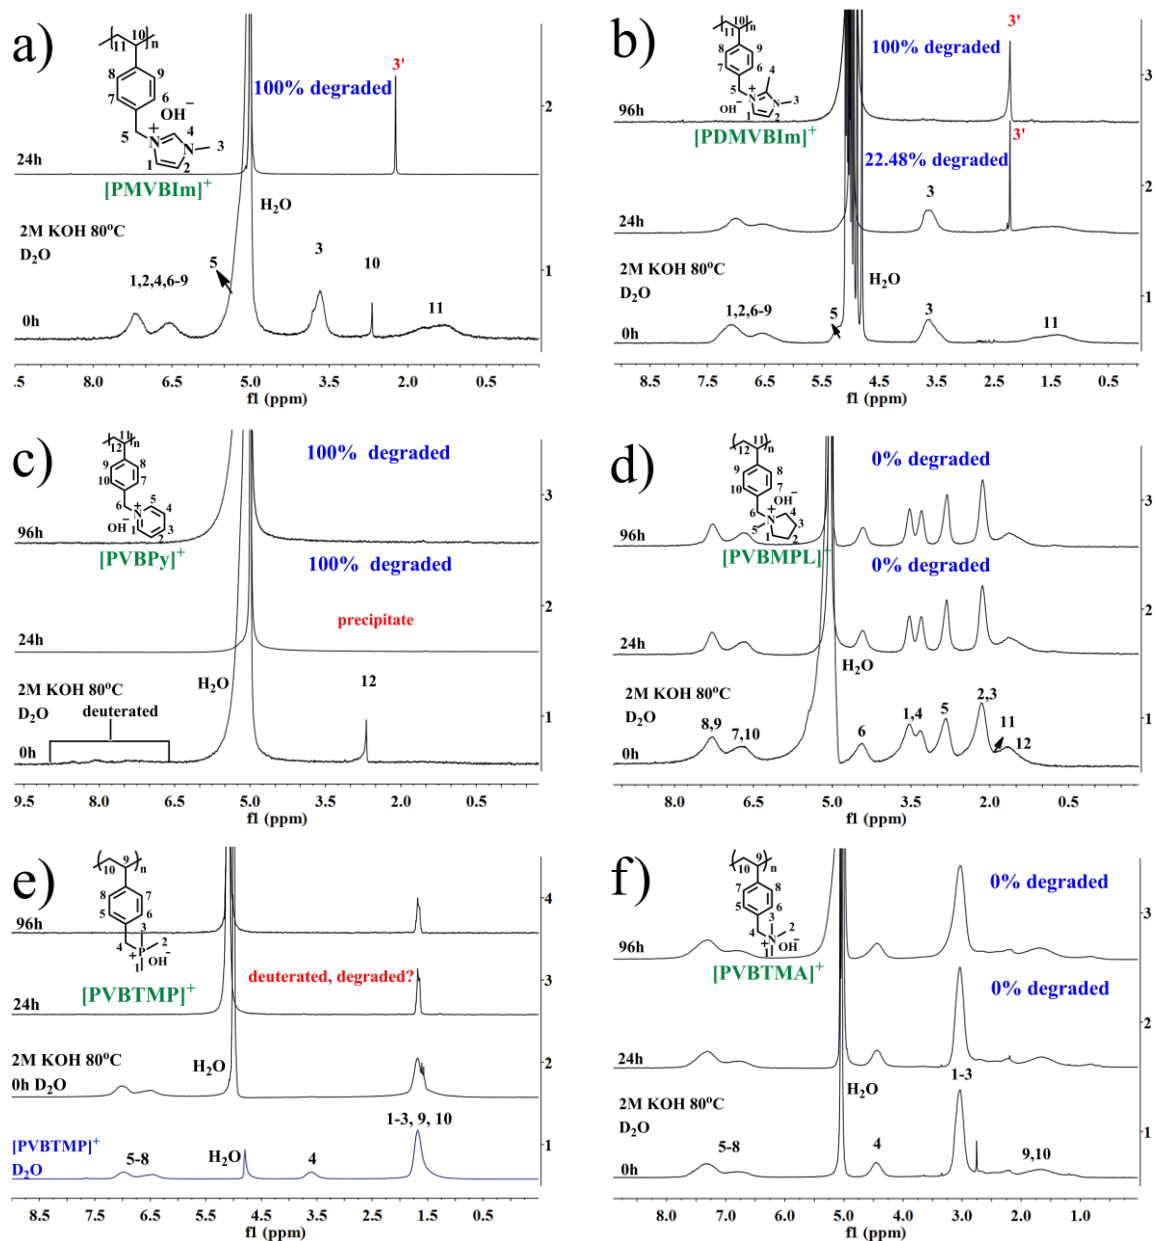

**Figure S15.**  $^1\text{H}$  NMR spectra for (a) [PMVBIm]<sup>+</sup>, (b) [PDMVBIm]<sup>+</sup>, (c) [PVBPy]<sup>+</sup>, (d) [PVBMP1]<sup>+</sup>, (e) [PVBTMP]<sup>+</sup> and (f) [PVBTMA]<sup>+</sup> in 2 M KOH ([KOH]/[cation] = 15/1, molar ratio) D<sub>2</sub>O solution at 80 °C for 24 and 96 h, respectively.

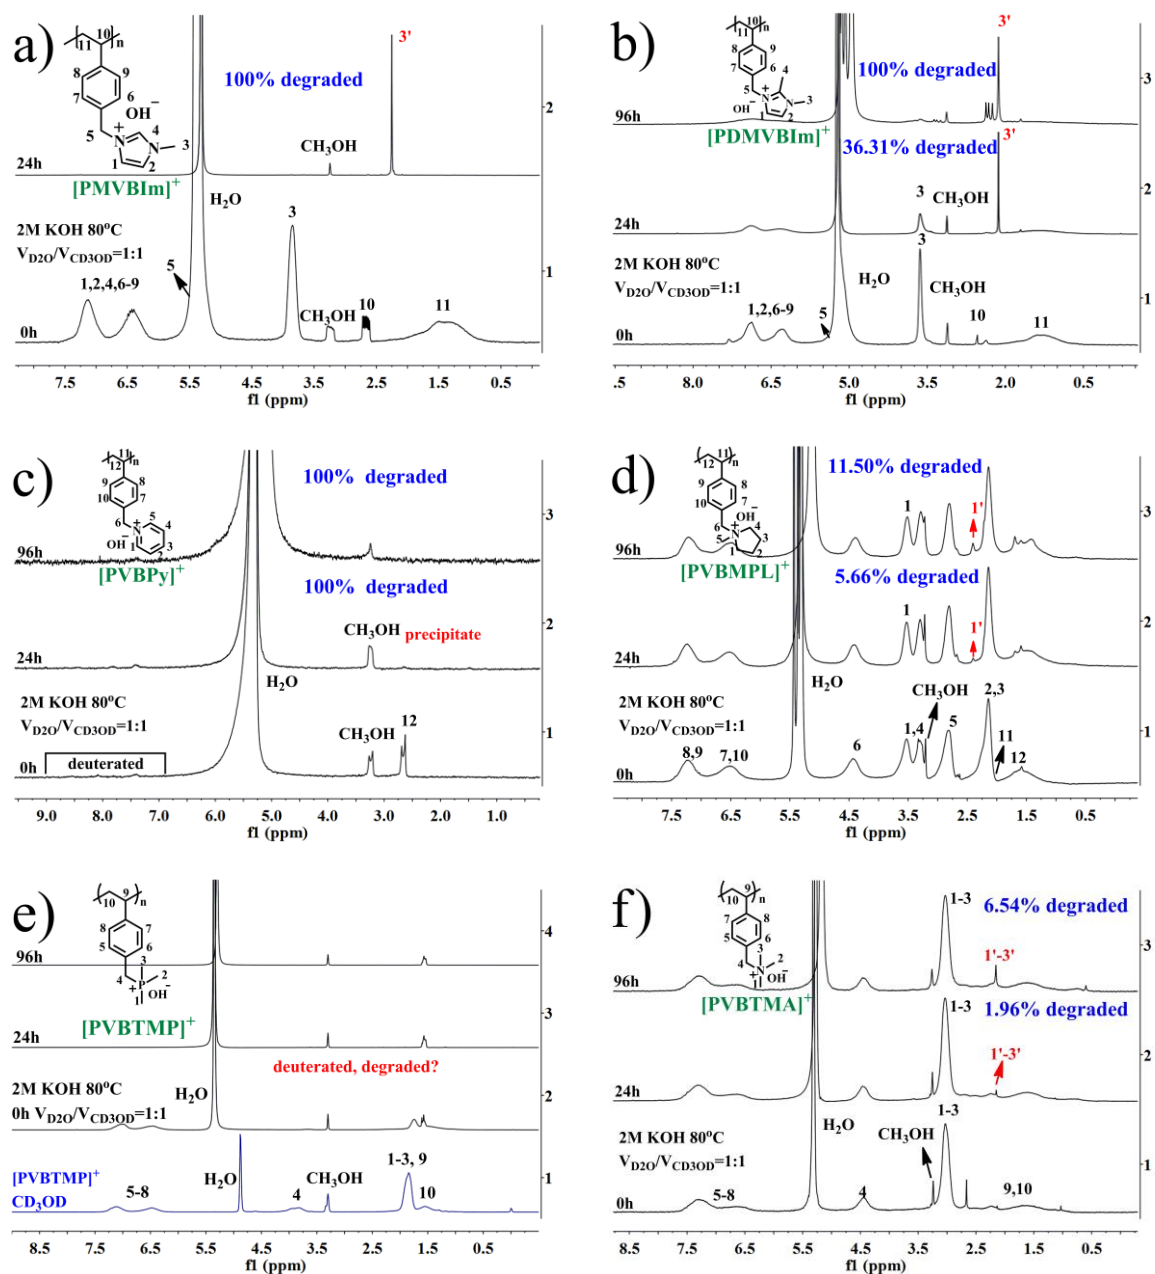

**Figure S16.**  $^1\text{H}$  NMR spectra for (a) [PMVBI] $^m_+$ , (b) [PDMVBI] $^m_+$ , (c) [PVBPy] $^m_+$ , (d) [PVBMP]L $^m_+$ , (e) [PVBTTMP] $^m_+$  and (f) [PVBTTMA] $^m_+$  in 2 M KOH ( $[\text{KOH}]/[\text{cation}] = 15/1$ , molar ratio) mixed solution ( $\text{V}_{\text{D}_2\text{O}}/\text{V}_{\text{CD}_3\text{OD}}=1:1$ ) at 80 °C for 24 and 96 h, respectively.

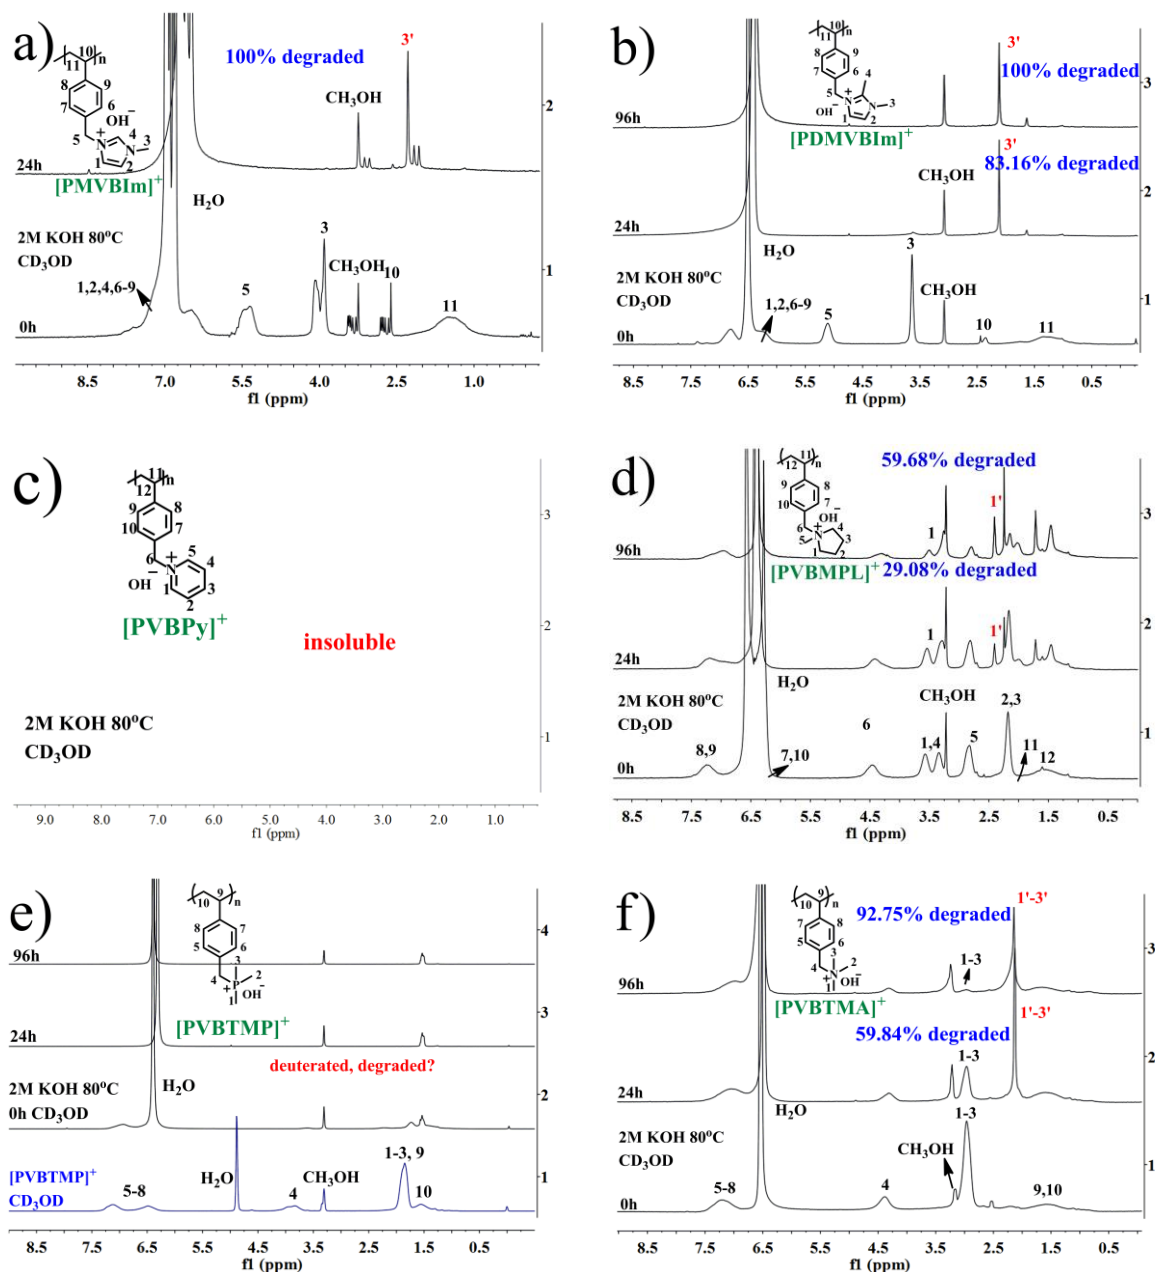

**Figure 17.**  $^1H$  NMR spectra for (a)  $[PMVBI]_m^+$ , (b)  $[PDMVBI]_m^+$ , (c)  $[PVBPy]^+$ , (d)  $[PVBMP]_m^+$ , (e)  $[PVBTMP]^+$  and (f)  $[PVBTMA]_m^+$  in 2 M KOH ( $[KOH]/[cation] = 15/1$ , molar ratio)  $CD_3OD$  solution at 80 °C for 24 and 96h, respectively.

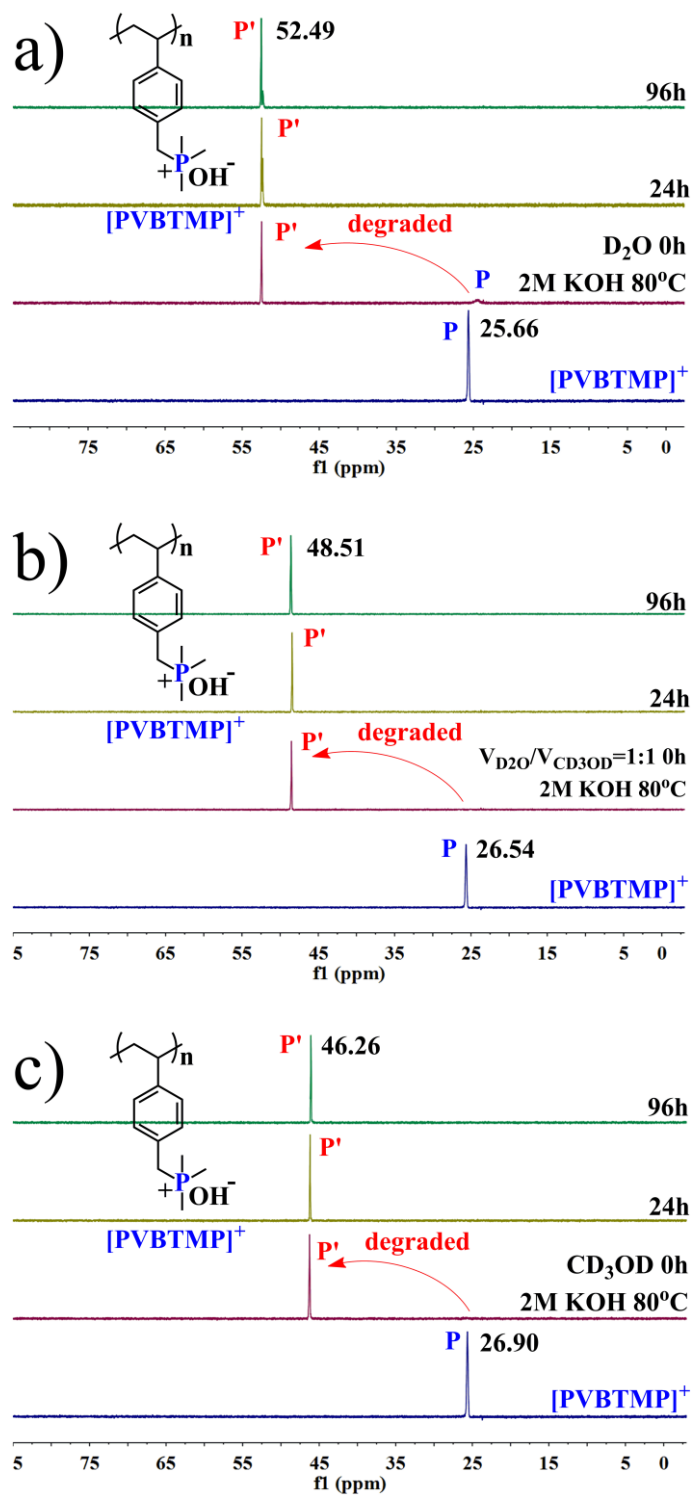

**Figure S18.** <sup>31</sup>P NMR spectra for [PVBTMP]<sup>+</sup> and [PVBTMP]<sup>+</sup> in 2 M KOH ([KOH]/[cation] = 15/1, molar ratio) (a) D<sub>2</sub>O, (b) V<sub>D<sub>2</sub>O</sub>/V<sub>CD<sub>3</sub>OD</sub>=1:1 and (c) CD<sub>3</sub>OD solutions at 80 °C for 0, 24 and 96h, respectively.

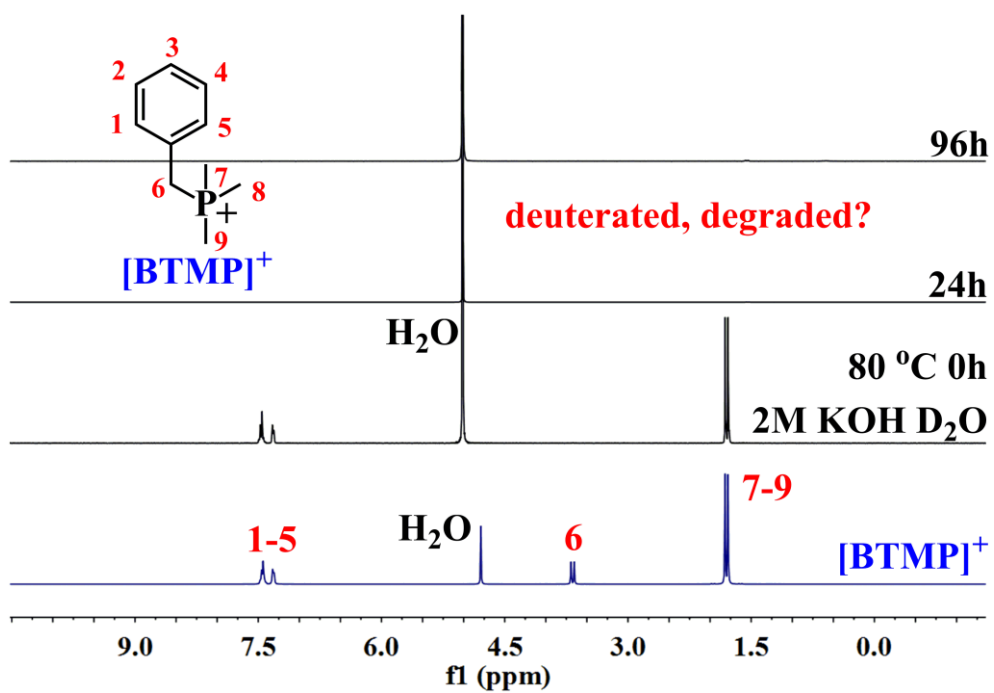

**Figure S19.**  $^1\text{H}$  NMR spectra for  $[\text{BTMP}]^+$  and  $[\text{BTMP}]^+$  in 2 M KOH ( $[\text{KOH}]/[\text{cation}] = 15/1$ , molar ratio)  $\text{D}_2\text{O}$  solution at 80 °C for 0, 24 and 96h, respectively.

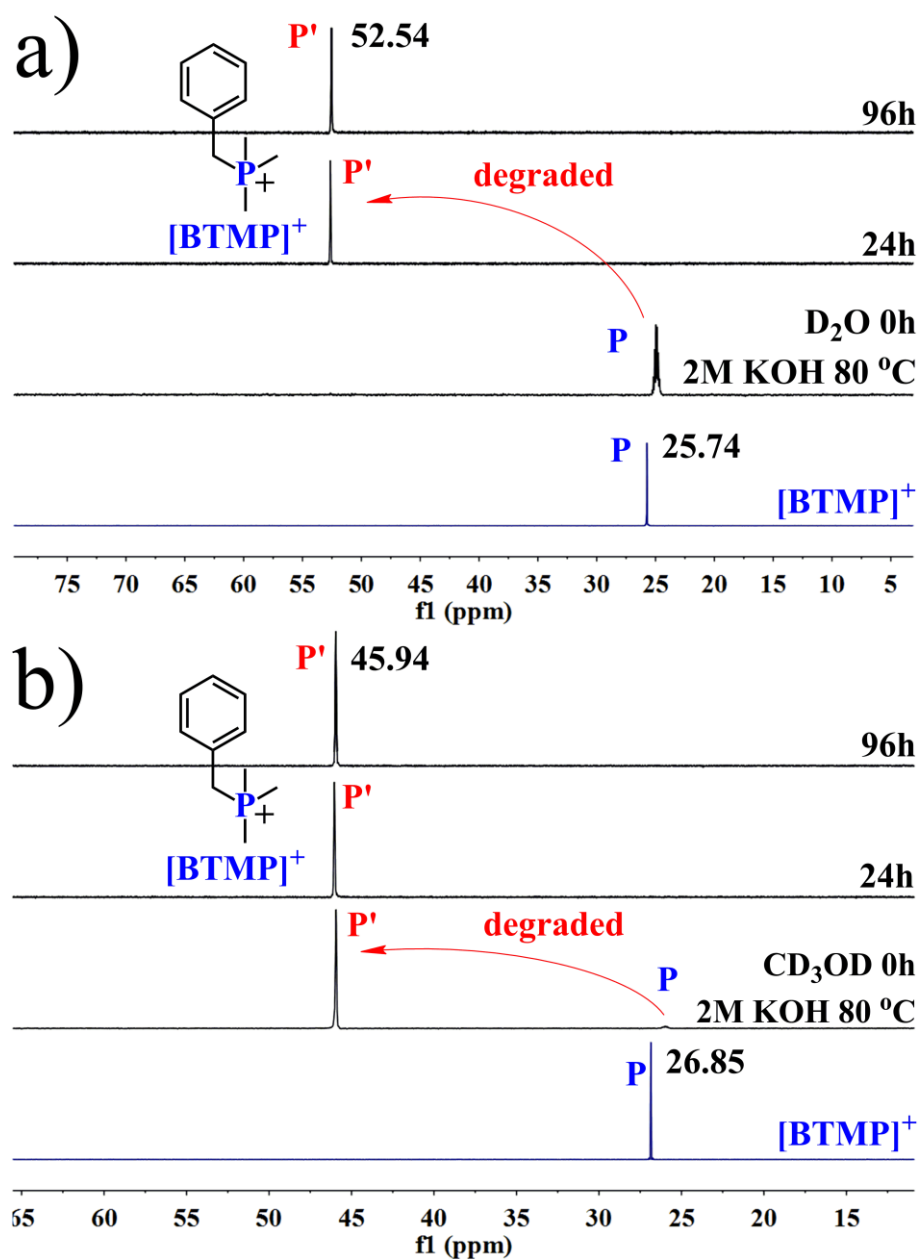

**Figure S20.**  $^{31}\text{P}$  NMR spectra for  $[\text{BTMP}]^+$  and  $[\text{BTMP}]^+$  in 2 M KOH ([KOH]/[cation] = 15/1, molar ratio) (a)  $\text{D}_2\text{O}$  and (b)  $\text{CD}_3\text{OD}$  solutions at 80 °C for 0, 24 and 96h, respectively.

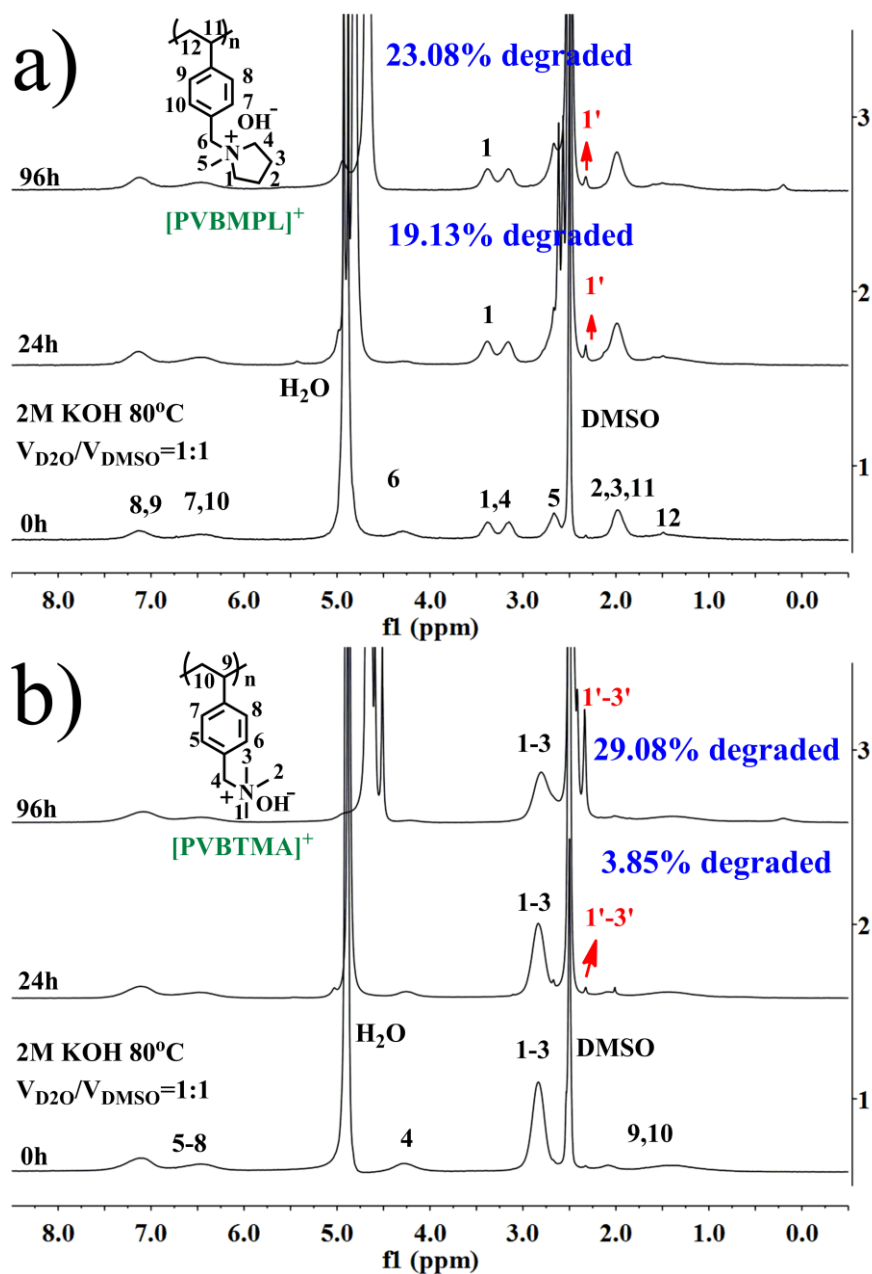

**Figure S21.** <sup>1</sup>H NMR spectra for (a) [PVBMP]<sup>+</sup> and (b) [PVBMTMA]<sup>+</sup> in 2 M KOH ([KOH]/[cation] = 15/1, molar ratio) mixed solution (V<sub>D<sub>2</sub>O</sub>/V<sub>DMSO</sub>=1:1) at 80 °C for 0, 24 and 96h, respectively.

**Table S1.** The IEC values of cationic polymers in 2 M KOH ([KOH]/[cation] = 15/1, molar ratio) solutions at 80 °C for 96 h.

| Cationic<br>Polymers | IEC (mmol g <sup>-1</sup> ) |                                   |                                                                                  |                                     |                                                                      |
|----------------------|-----------------------------|-----------------------------------|----------------------------------------------------------------------------------|-------------------------------------|----------------------------------------------------------------------|
|                      | Initial value               | D <sub>2</sub> O<br>(2 M KOH 96h) | V <sub>D<sub>2</sub>O</sub> /V <sub>CD<sub>3</sub>OD</sub> =1:1<br>(2 M KOH 96h) | CD <sub>3</sub> OD<br>(2 M KOH 96h) | V <sub>D<sub>2</sub>O</sub> /V <sub>DMSO</sub> =1:1<br>(2 M KOH 96h) |
| [PVB MPL][OH]        | 4.566                       | 4.566                             | 4.230                                                                            | 2.396                               | 3.858                                                                |
| [PVB TMA][OH]        | 5.181                       | 5.181                             | 4.941                                                                            | 0.524                               | 4.033                                                                |
| [PDMVB Im][OH]       | 4.348                       | 0.000                             | 0.000                                                                            | 0.000                               | \                                                                    |
| [PMVB Im][OH]        | 4.630                       | 0.000                             | 0.000                                                                            | 0.000                               | \                                                                    |
| [PVB Py][OH]         | 4.695                       | 0.000                             | 0.000                                                                            | 0.000                               | \                                                                    |
| [PVB TMP][OH]        | 4.762                       | 0.000                             | 0.000                                                                            | 0.000                               | \                                                                    |
